# Supplementary material for: A new aza-crown macrocyclic fluorescent chemosensor (N3O2donor atoms) for magnesium ions in aqueous ethanol solution
Source: Royal Society of Chemistry journal article supplement (doi:10.1039/d2nj05159a), 2022-12-27
Supplement: d2nj05159a1.pdf [file d2nj05159a1.pdf]

A new aza-crown macrocyclic fluorescence chemosensor ( $N_3O_2$  donor atoms) for  
magnesium ions in aqueous ethanol solution

Fariba Khanbabai<sup>a</sup>, Reza Azadbakht<sup>a,\*</sup>, Mostafa Koolivand<sup>a</sup>

<sup>a</sup>Faculty of chemistry, Bu-Ali Sina University, Hamedan 65174, Iran

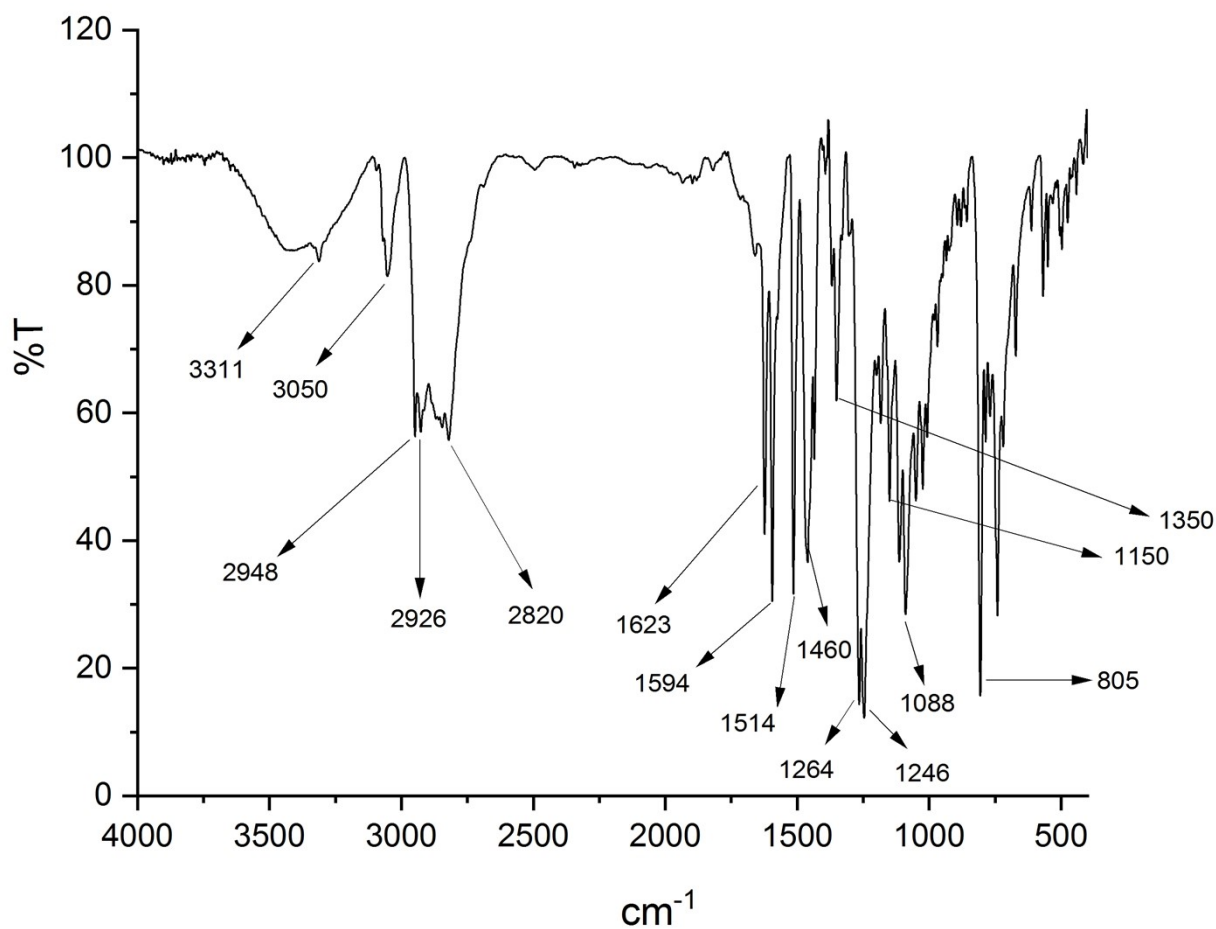

**Fig. S1.** IR spectrum of L

\*Corresponding author. Tel.: +98 8138282807; Fax: +98 8138381602.  
E-mail address: [r\\_azadbakht@yahoo.com](mailto:r_azadbakht@yahoo.com) (R. Azadbakht)

Fariba-Khanbabae-14-1401-5-6

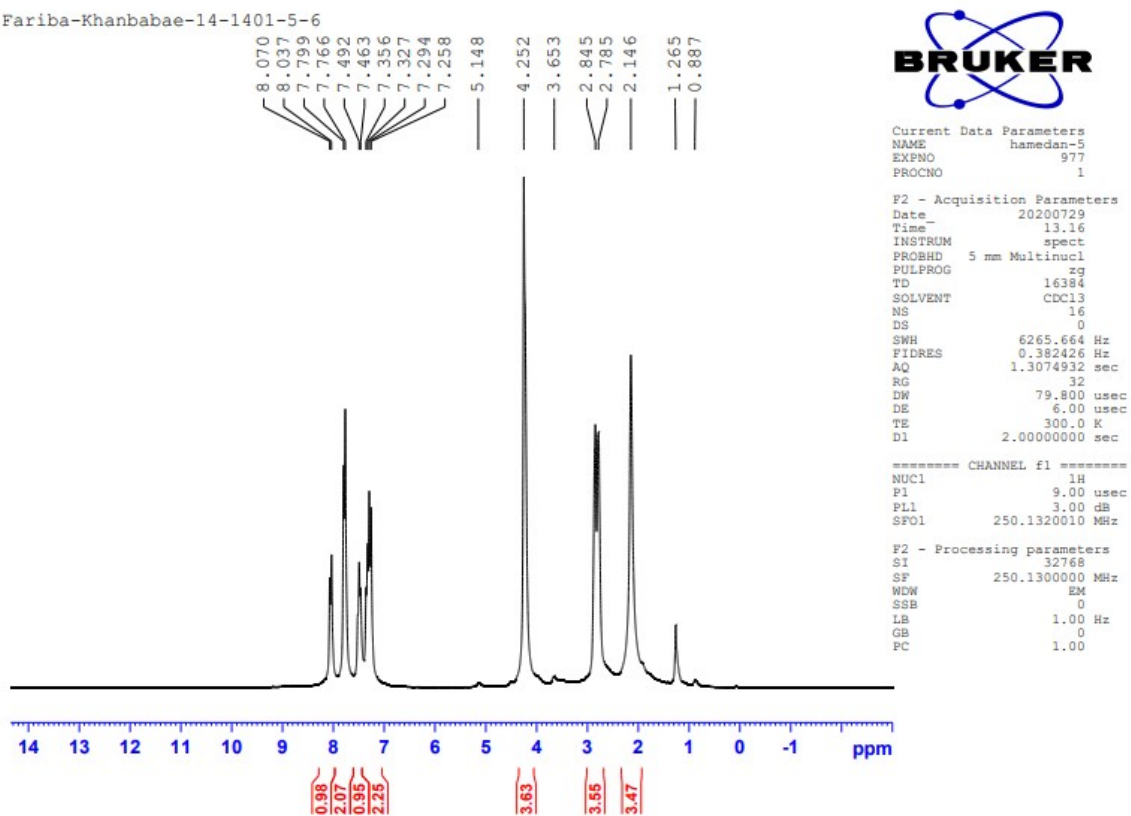

Fig. S2. <sup>1</sup>H NMR spectrum of L in CDCl<sub>3</sub>.

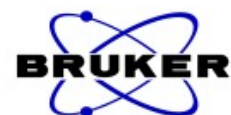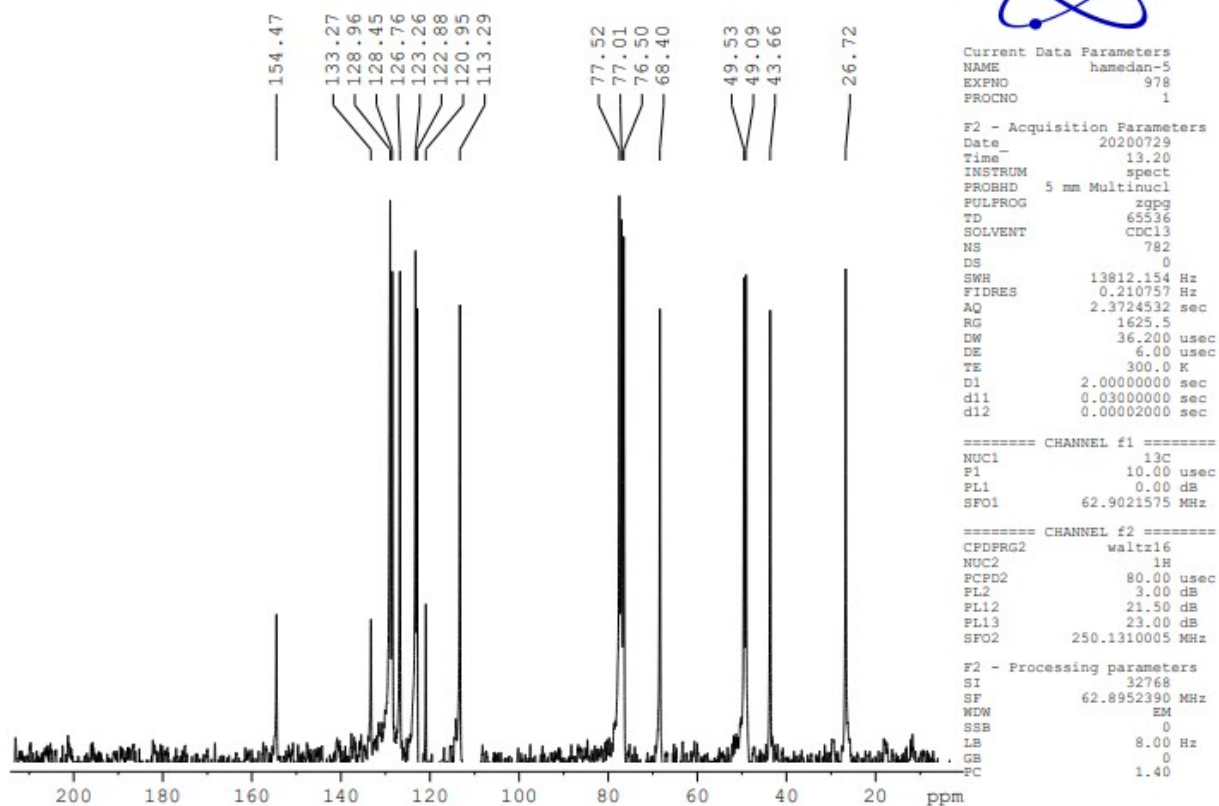

Fig. S3. <sup>13</sup>CNMR spectrum of L in CDCl<sub>3</sub>.

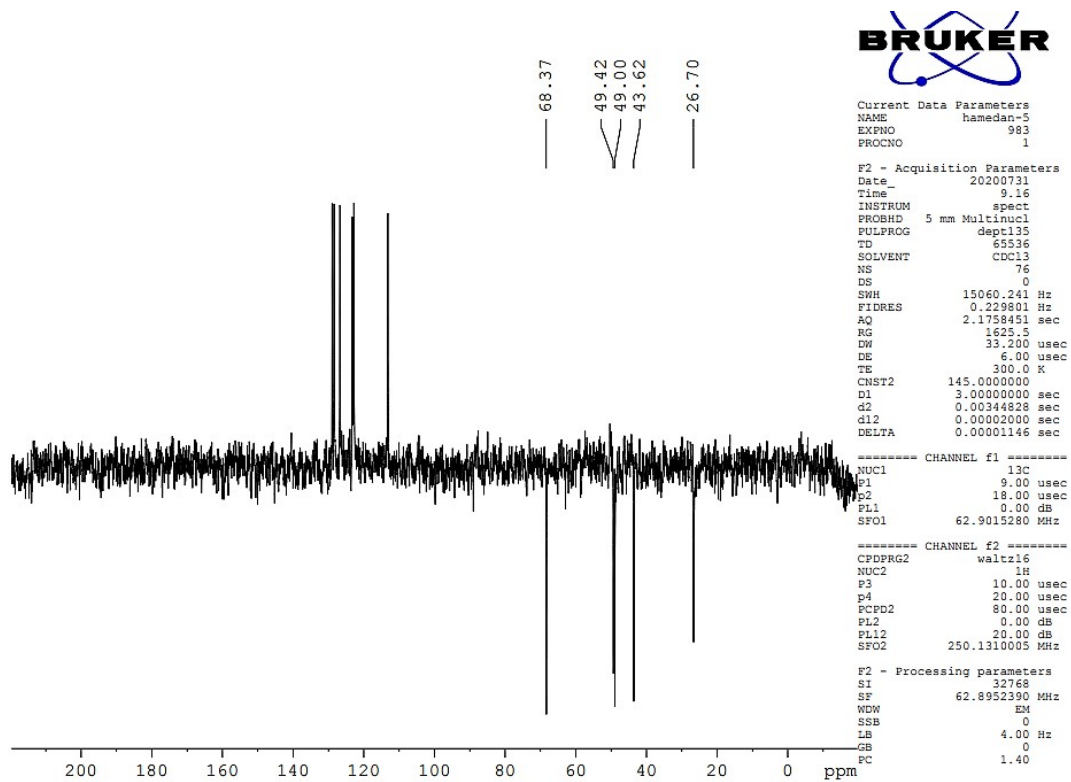

Fig. S4. DEPT spectrum of L in CDCl<sub>3</sub>.

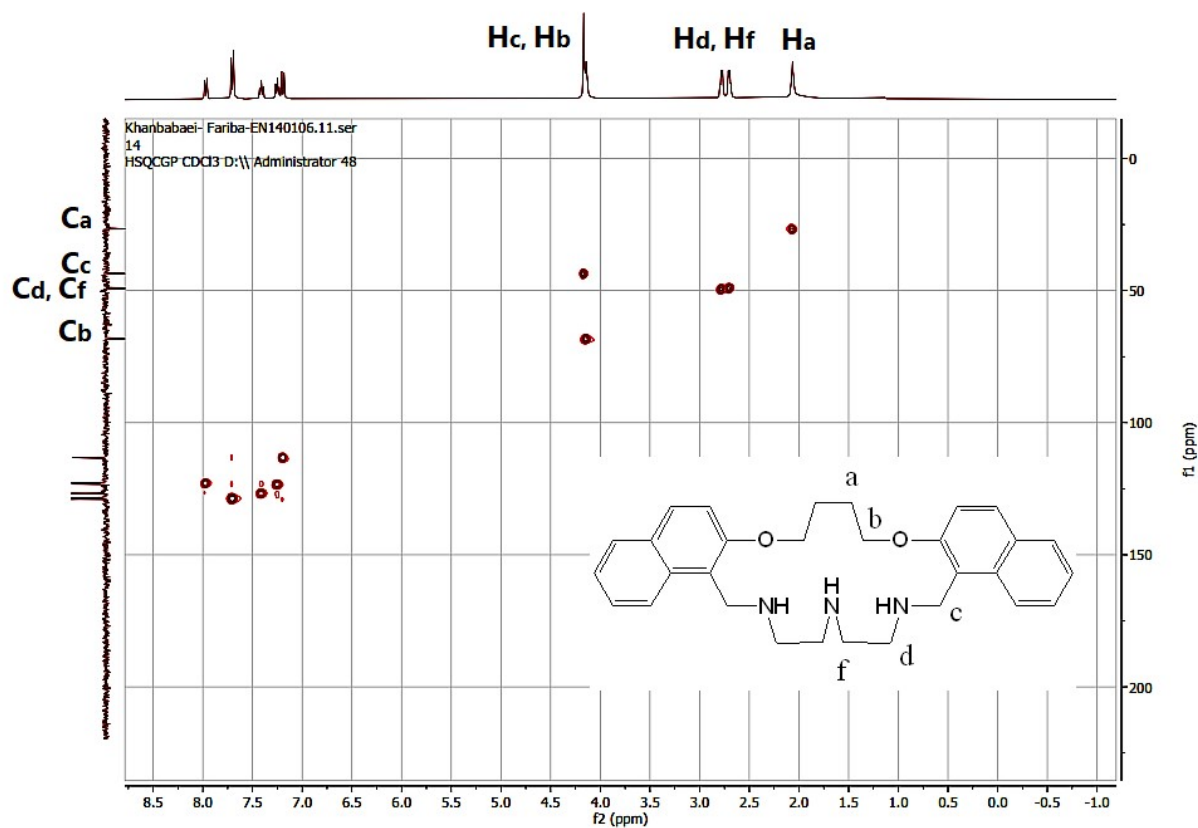

**Fig. S5.** HSQC NMR spectrum of L in CDCl<sub>3</sub> along with numbering scheme of the proton and carbon assignments for L.

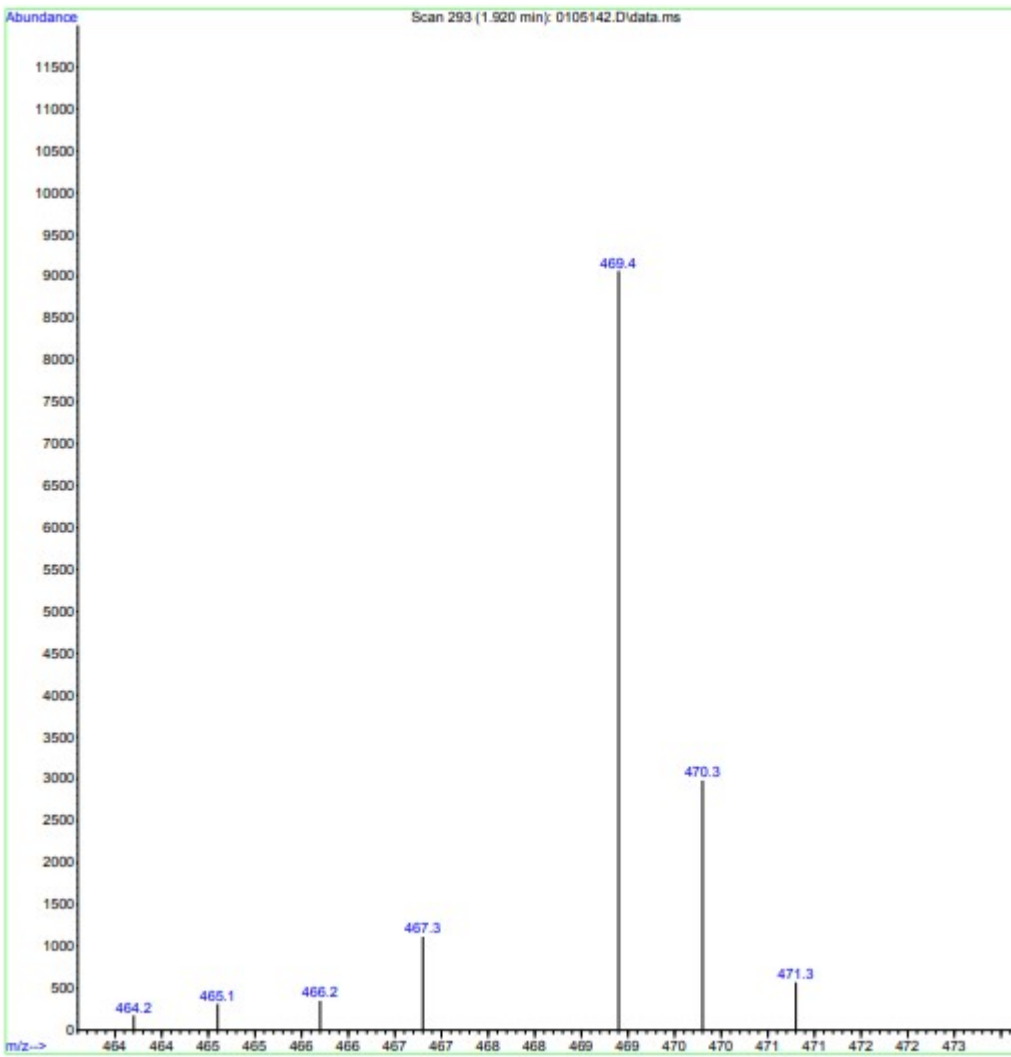

Fig. S6. Mass spectrum of L

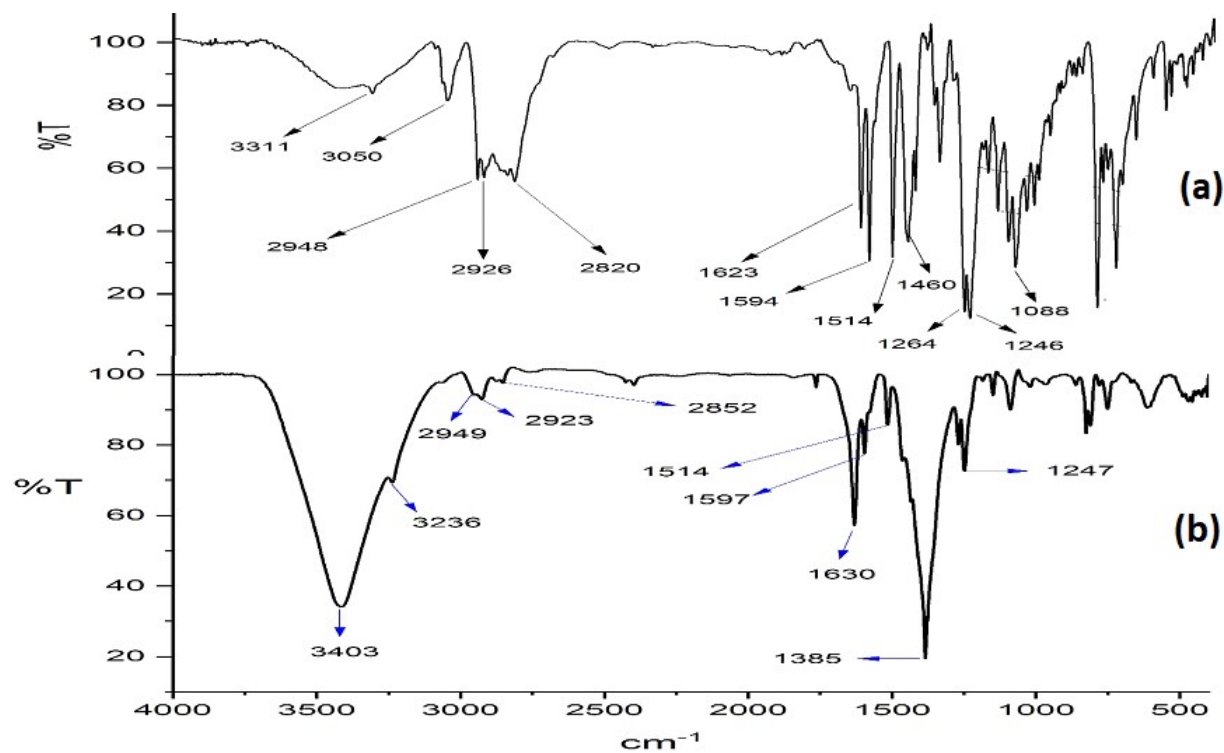

**Fig. S7.** IR spectra of L (a) L and (b)  $[\text{MgL}]^{2+}$

**Table S1.** Selected bond lengths (Å) and angles (°) for  $[\text{MgL}]^{2+}$  and L.

|              | $[\text{MgL}]^{2+}$ |           | L    |
|--------------|---------------------|-----------|------|
| Bond length  | (Å)                 | Distance  | (Å)  |
| Mg-O(1)      | 2.079               | O(1)-N(1) | 3.43 |
| Mg-O(2)      | 2.110               | O(1)-N(2) | 5.16 |
| Mg-N(1)      | 2.113               | O(1)-N(3) | 7.13 |
| Mg-N(2)      | 2.200               | O(2)-N(1) | 5.76 |
| Mg-N(3)      | 2.174               | O(2)-N(2) | 4.59 |
| Bond angle   | (°)                 | O(2)-N(3) | 3.71 |
| O(1)-Mg-O(2) | 85.39               | O(1)-O(2) | 5.83 |

|              |       |           |      |
|--------------|-------|-----------|------|
| O(1)-Mg-N(1) | 91.30 | N(1)-N(2) | 3.30 |
| N(1)-Mg-N(2) | 81.59 | N(1)-N(3) | 5.19 |
| N(2)-Mg-N(3) | 80.75 | N(2)-N(3) | 2.91 |
| N(3)-Mg-O(2) | 76.49 |           |      |

---

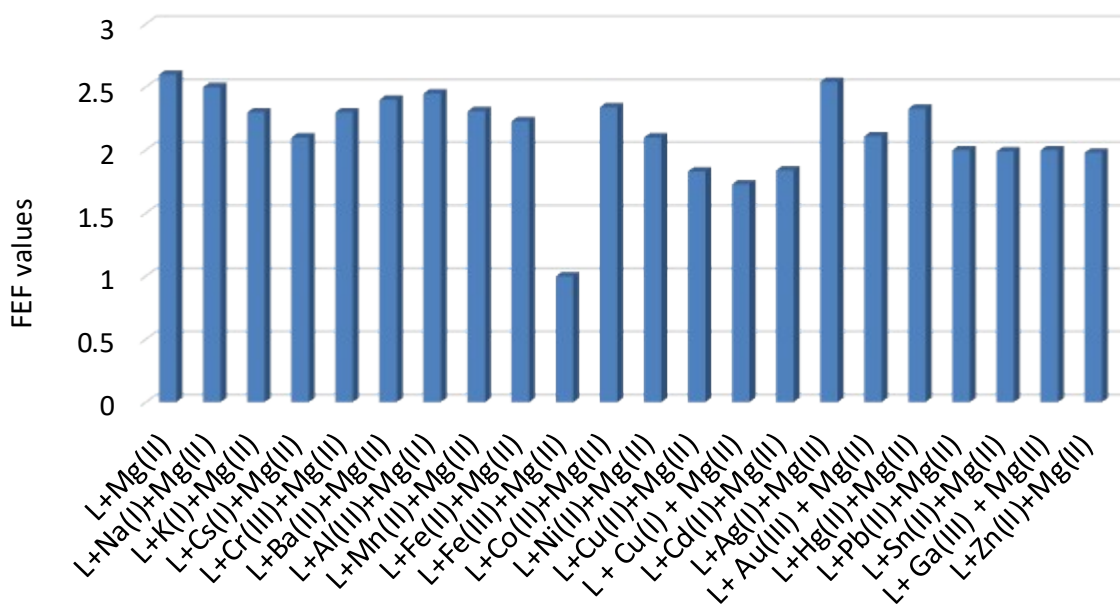

**Fig. S8.** The FEF value of (L + Mg<sup>2+</sup>) in the presence of various metal ions in EtOH–H<sub>2</sub>O solution (9:1, v/v) at room temperature.



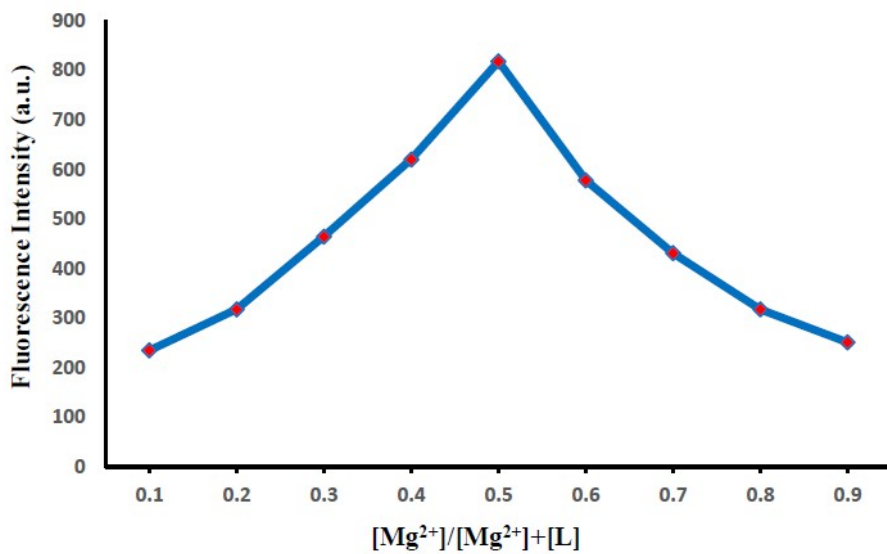

Fig. S9. Job's plot analysis of L and  $Mg^{2+}$ .

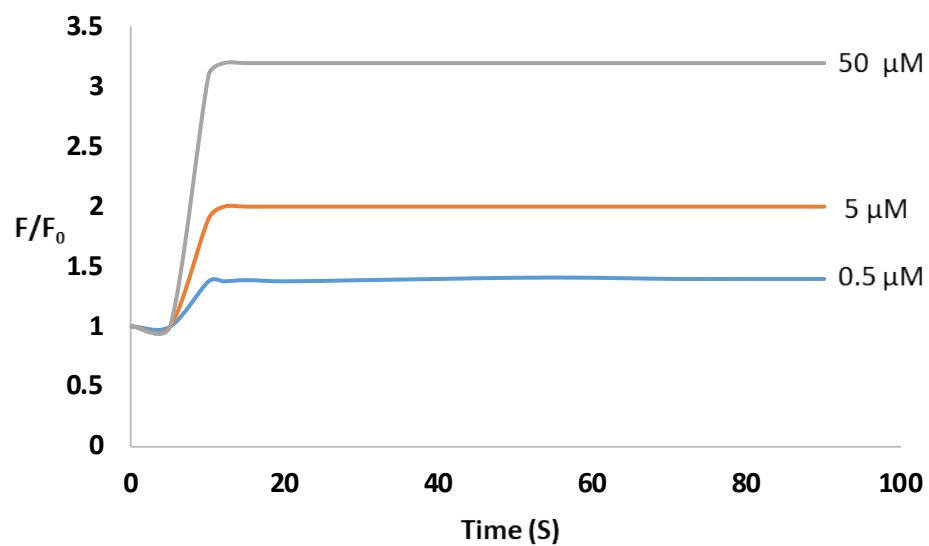

Fig. S10. Kinetics of the fluorescence enhancement of L (10  $\mu M$ ) in the presence of different concentrations of  $Mg^{2+}$ . Fluorescence intensity was recorded at 360 nm.

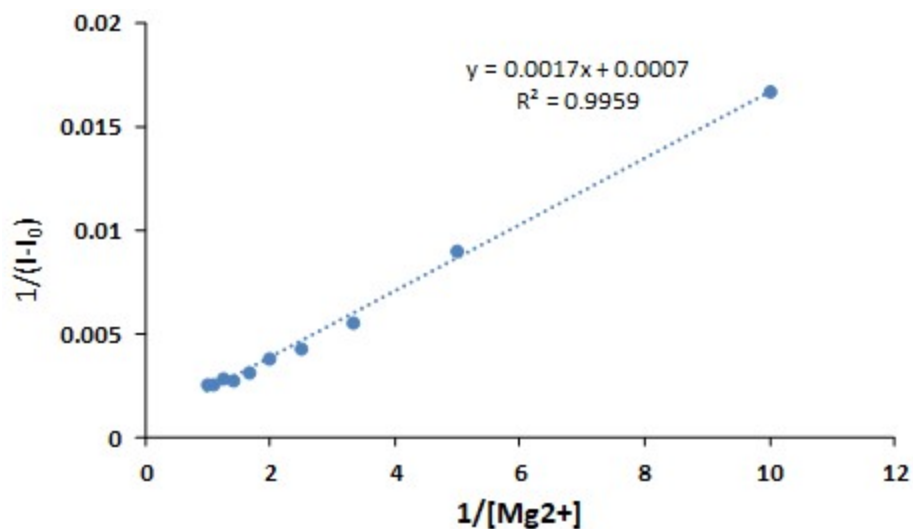

Fig. S11. Benesi-Hildebrand plot of L (10  $\mu$ M) with  $Mg^{2+}$  in EtOH/ $H_2O$  (9:1, v/v) solution.

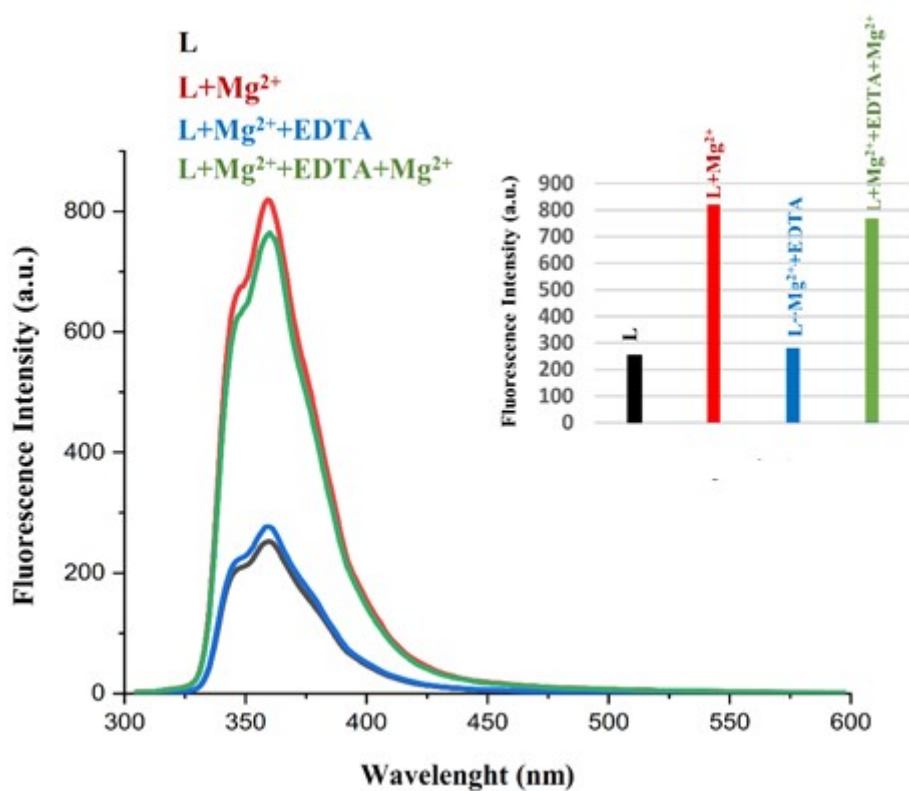

Fig. S12. Chemical reversibility behavior of the binding of L and  $[MgL]^{2+}$  ions. Fluorescence intensity was recorded at 360 nm.
